# Supplementary material
Source: PubMed Central journal article supplement (PMC5803418)
Supplement: NIHMS923108-supplement-supplement_1.pdf [file NIHMS923108-supplement-supplement_1.pdf]

**Supplemental Table SI. TaqMan copy number assay details**

| Locus   | Assay ID      | Gene            | Target Coordinates | # Cases Tested | # Controls Tested |
|---------|---------------|-----------------|--------------------|----------------|-------------------|
| 1p34.2  | Hs03369968_cn | <i>CCDC30</i>   | Chr.1:43,018,088   | 34             | 198               |
|         | Hs03355957_cn |                 | Chr.1:43,031,517   | 34             | 24                |
| 1q25.3  | Hs00499239_cn | <i>COLGALT2</i> | Chr.1:183,923,980  | 34             | 25                |
|         | Hs05762474_cn | -               | Chr.1:184,184,766  | 34             | 198               |
| 2p12    | Hs05813312_cn | -               | Chr.2:81,206,766   | 34             | 198               |
|         | Hs04677525_cn |                 | Chr.2:81,331,795   | 34             | 24                |
| 3q26.32 | Hs04741060_cn | -               | Chr.3:176,979,148  | 34             | 24                |
|         | Hs06667233_cn |                 | Chr.3:176,987,683  | 34             | 198               |
| 4q22.3  | Hs04852209_cn | <i>BMPRI3</i>   | Chr.4:95,987,323   | 34             | 24                |
|         | Hs02817570_cn |                 | Chr.4:96,025,606   | 34             | 24                |
|         | Hs04866592_cn | <i>UNC5C</i>    | Chr.4:96,112,131   | 34             | 198               |
| 4q24    | Hs05939319_cn | -               | Chr.4:104,837,852  | 34             | 24                |
|         | Hs04866497_cn |                 | Chr.4:104,982,988  | 34             | 198               |
|         | Hs05932226_cn |                 | Chr.4:105,031,088  | 34             | 24                |
| 4q28.3  | Hs05912262_cn | -               | Chr.4:133,019,199  | 34             | 24                |
|         | Hs04849484_cn |                 | Chr.4:133,037,687  | 34             | 198               |
|         | Hs04883161_cn |                 | Chr.4:133,028,670  | 34             | 24                |
| 5p15.2  | Hs06018549_cn | <i>CTNND2</i>   | Chr.5:11,868,014   | 34             | 198               |
|         | Hs05998078_cn |                 | Chr.5:11,880,196   | 34             | 25                |
| 6p24.3  | Hs04914073_cn | <i>GCNT2</i>    | Chr.6:10,533,075   | 34             | 25                |
|         | Hs03618929_cn | <i>C6orf52</i>  | Chr.6:10,684,894   | 34             | 198               |
| 6p12.3  | Hs06161050_cn | -               | Chr.6:49,785,779   | 34             | 24                |
|         | Hs06153060_cn | <i>CRISPI</i>   | Chr.6:49,804,497   | 34             | 198               |
| 6q12    | Hs03089586_cn | -               | Chr.6:66,978,264   | 34             | 198               |
|         | Hs06795352_cn |                 | Chr.6:67,187,958   | 34             | 198               |
|         | Hs06815519_cn |                 | Chr.6:67,379,660   | Probe excluded |                   |
| 7p12.2  | Hs05006345_cn | -               | Chr.7:49,221,712   | 34             | 198               |
|         | Hs04985951_cn |                 | Chr.7:49,293,487   | 34             | 24                |
| 9p23    | Hs03276415_cn | <i>PTPRD</i>    | Chr.9:10,333,515   | 34             | 24                |
|         | Hs03277406_cn | -               | Chr.9:10,640,718   | 34             | 24                |
|         | Hs06894124_cn |                 | Chr.9:10,996,224   | 34             | 24                |
|         | Hs06871865_cn |                 | Chr.9:11,043,173   | 34             | 198               |
| 11p15.4 | Hs06324577_cn | <i>STIMI</i>    | Chr.11:3,927,239   | 34             | 25                |
|         | Hs06286180_cn |                 | Chr.11:3,940,908   | 34             | 198               |
|         | Hs06291426_cn |                 | Chr.11:3,961,210   | 34             | 25                |
| 13q14.3 | Hs06378690_cn | -               | Chr.13:54,280,419  | 34             | 198               |
|         | Hs05292114_cn |                 | Chr.13:54,443,857  | 34             | 25                |
| 17p12   | Hs05513120_cn | <i>SHISA6</i>   | Chr.17:11,453,820  | 34             | 198               |
|         | Hs05498056_cn | <i>ZNF18</i>    | Chr.17:11,887,582  | 34             | 24                |
|         | Hs06420475_cn | <i>MYOCD</i>    | Chr.17:12,594,654  | 34             | 24                |
| 17q22   | Hs03978967_cn | <i>C17orf67</i> | Chr.17:54,890,968  | 34             | 24                |
|         | Hs03973468_cn | <i>DGKE</i>     | Chr.17:54,942,334  | 34             | 198               |

**Supplemental Table SII.** Additional rare X chromosome CNVs identified but not followed up in patients with prune belly syndrome

| <b>Locus</b> | <b>Genomic Coordinates</b> | <b>Size (bps)</b> | <b>Type</b> | <b>Study Subject ID</b> | <b>Gene(s)/Transcript(s)</b> |
|--------------|----------------------------|-------------------|-------------|-------------------------|------------------------------|
| Xq13.2       | 71,784,938.. 71,957,183    | 172,245           | Dupl        | 12                      | <i>PHKA1</i>                 |
| Xq21.1       | 81,243,685.. 81,273,865    | 30,180            | Del         | 12                      | NA                           |

Abbreviations: Del: Deletion, Dupl: Duplication.  
Coordinates (hg19) predicted using PennCNV.

**Supplemental Table SIII.** Phenotype of 14 prune belly syndrome cases with identified CNVs

| <b>Study Subject ID</b> | <b>Phenotype</b>                                                                    |
|-------------------------|-------------------------------------------------------------------------------------|
| 1                       | Hirschsprung, intestinal duplication, unspecified anomaly of gastrointestinal tract |
| 2                       | Dextrocardia, imperforate anus                                                      |
| 3                       | Isolated                                                                            |
| 4                       | Intestinal duplication, accessory kidney, absence of ureter                         |
| 5                       | Ostium secundum, hip dysplasia                                                      |
| 6                       | Isolated                                                                            |
| 7                       | Gastrointestinal tract malrotation                                                  |
| 8                       | Gastroschisis                                                                       |
| 9                       | Isolated                                                                            |
| 10                      | Isolated                                                                            |
| 11                      | Isolated                                                                            |
| 12                      | Isolated                                                                            |
| 13                      | Isolated                                                                            |
| 14                      | Accessory kidney, pectus excavatum, omphalocele                                     |
